# Supplementary material for: Understanding Rural Women’s Domestic Work Experiences (DWE) in Ibadan, Nigeria: Development of a Measurement Tool Using Confirmatory Factor Analysis
Source: MDPI journal article supplement (doi:10.3390/ijerph182111043), 2021-10-21
Supplement: s1 [file s1]

**Table S1.** Descriptive and reliability analysis of the DWE measures

| DWE Measures                                                           | Mean | SD   | IIT  | ITC  | Cronbach's Alpha               |
|------------------------------------------------------------------------|------|------|------|------|--------------------------------|
| <b>Frequency of Common Tasks (<i>Never to Always</i>)</b>              |      |      |      |      | $\alpha^{\text{total}} = 0.72$ |
| 1. Fetch water                                                         | 2.79 | 0.91 | 0.25 | 0.27 | 0.73                           |
| 2. Sweeping                                                            | 3.19 | 0.66 | 0.25 | 0.30 | 0.72                           |
| 3. Cleaning                                                            | 2.20 | 1.00 | 0.23 | 0.42 | 0.71                           |
| 4. Carrying Children                                                   | 2.85 | 0.96 | 0.21 | 0.59 | 0.70                           |
| 5. Bathing and Dressing Children                                       | 3.23 | 0.70 | 0.19 | 0.76 | 0.66                           |
| 6. Washing Clothes                                                     | 2.65 | 0.68 | 0.24 | 0.36 | 0.74                           |
| 7. Cooking meals                                                       | 3.33 | 0.68 | 0.20 | 0.69 | 0.67                           |
| 8. Washing Dishes                                                      | 3.15 | 0.70 | 0.24 | 0.55 | 0.72                           |
| <b>Stress Appraisal (<i>Strongly Agree to Strongly Disagree</i>)</b>   |      |      |      |      | $\alpha^{\text{total}} = 0.67$ |
| 9. Felt drained or tired after completing domestic tasks               | 2.03 | 0.73 | 0.38 | 0.46 | 0.65                           |
| 10. Doing household tasks requires a lot of physical energy            | 2.04 | 0.77 | 0.25 | 0.77 | 0.62                           |
| 11. Caring for children requires a lot of physical energy              | 2.04 | 0.82 | 0.29 | 0.65 | 0.63                           |
| 12. Taking care of the home is not stressful.                          | 1.81 | 0.72 | 0.43 | 0.40 | 0.69                           |
| <b>Demand and Control (<i>Strongly Agree to Strongly Disagree</i>)</b> |      |      |      |      | $\alpha^{\text{total}} = 0.68$ |
| 13. Adequate time to complete the domestic tasks.                      | 1.80 | 0.89 | 0.34 | 0.51 | 0.64                           |
| 14. Adequate time for hobbies or other meaningful activities.          | 1.83 | 0.83 | 0.24 | 0.52 | 0.76                           |
| 15. Enjoy doing domestic work                                          | 1.32 | 0.67 | 0.59 | 0.25 | 0.74                           |
| 16. Can choose not to do chores when tired                             | 1.83 | 0.71 | 0.30 | 0.50 | 0.58                           |
| <b>Proximity to water Source</b>                                       |      |      |      |      | $\alpha^{\text{total}} = 0.9$  |
| 17. Distance to water source                                           | 2.50 | 0.93 | 0.80 | 0.82 | 0.89                           |
| 18. Where is source located                                            | 2.78 | 0.86 | 0.69 | 0.91 | 0.81                           |
| 19. Time to complete water trip                                        | 2.70 | 1.01 | 0.78 | 0.83 | 0.88                           |
| <b>Water Carriage</b>                                                  |      |      |      |      | $\alpha^{\text{total}} = 0.83$ |
| 20. Number of Trips/per collection period                              | 2.35 | 0.91 | 0.54 | 0.72 | 0.78                           |
| 21. Quantity per trip/collection period                                | 2.48 | 0.95 | 0.60 | 0.69 | 0.82                           |
| 22. Type of Loading                                                    | 2.57 | 0.75 | 0.44 | 0.92 | 0.70                           |
| 23. Support while lifting water                                        | 2.39 | 0.74 | 0.63 | 0.64 | 0.84                           |
| <b>Experience of Water Scarcity</b>                                    |      |      |      |      | $\alpha^{\text{total}} = 0.86$ |
| 24. Worry about having enough water for all needs. (Frequency)         | 2.01 | 1.05 | 0.54 | 0.87 | 0.78                           |

|                                                                    |      |      |      |      |                                |
|--------------------------------------------------------------------|------|------|------|------|--------------------------------|
| 25. Rationed water usage (Frequency)                               | 1.89 | 0.92 | 0.52 | 0.87 | 0.76                           |
| 26. Angry or frustrated about not having enough water (Frequency). | 1.97 | 1.07 | 0.57 | 0.83 | 0.80                           |
| 27. Did not have enough water for household activities (Yes/No)    | 1.27 | 0.44 | 0.76 | 0.60 | 0.90                           |
| <b>Support</b>                                                     |      |      |      |      | $\alpha^{\text{total}} = 0.77$ |
| 28. Get assistance from family members (frequency)                 | 2.45 | 1.02 | 0.65 | 0.57 | 0.73                           |
| 29. Ask assistance from family members (Yes/No)                    | 1.64 | 0.48 | 0.66 | 0.56 | 0.72                           |
| 30. Ask assistance from family members (frequency)                 | 2.45 | 1.19 | 0.76 | 0.45 | 0.62                           |
| 31. Who is Responsible for water fetching                          | 1.64 | 0.74 | 0.33 | 0.30 | 0.77                           |

*SD= Standard Deviation; IIT= Mean Inter-item correlation; ITC= Item-total correlation,  $\alpha^{\text{total}}$  = average Cronbach's alpha per construct.*

**Table S2.** The final Domestic work experience survey questions

| <b>DWE Measures</b>                                                               | <b>Response 1</b>    | <b>Response 2</b>      | <b>Response 3</b>      | <b>Response 4</b>      | <b>Response 5</b>       |
|-----------------------------------------------------------------------------------|----------------------|------------------------|------------------------|------------------------|-------------------------|
| <b>Frequency of Common Domestic Tasks</b>                                         | Never/not<br>me      | Rarely                 | Sometimes              | Everyday               | More than Once a<br>day |
| 1. Fetching and Carrying water                                                    |                      |                        |                        |                        |                         |
| 2. Sweeping the floor                                                             |                      |                        |                        |                        |                         |
| 3. Cleaning                                                                       |                      |                        |                        |                        |                         |
| 4. Carrying Children                                                              |                      |                        |                        |                        |                         |
| 5. Bathing and dressing for Children                                              |                      |                        |                        |                        |                         |
| 6. Manually washing clothes                                                       |                      |                        |                        |                        |                         |
| 7. Cooking Meals                                                                  |                      |                        |                        |                        |                         |
| 8. Washing Dishes/kitchen ware                                                    |                      |                        |                        |                        |                         |
| <b>Water Sourcing and Carriage</b>                                                |                      |                        |                        |                        |                         |
| 17. Distance to water source                                                      | None                 | <5 minutes'<br>walk    | 6 -10 minutes'<br>walk | 11 minute and<br>above |                         |
| 18. Location of water source                                                      | Inside<br>Dwelling   | Within the<br>Compound | Elsewhere              |                        |                         |
| 19. Time to complete a round water trip                                           | None                 | < 10 minutes           | 10 -20 minutes         | >20 minutes            |                         |
| 20. Number of Water trips                                                         | None                 | < five trips           | 5-8 trips              | >8 trips               |                         |
| 21. Quantity of water carried per trip                                            |                      |                        | 5-9                    |                        |                         |
| <b>Experience of Water Scarcity</b>                                               | Never                | Rarely                 | Sometimes              | Often                  | Always                  |
| 24. Worry about having sufficient water for<br>household needs                    |                      |                        |                        |                        |                         |
| 25. Rationed water usage because of scarcity or<br>difficulty in collecting water |                      |                        |                        |                        |                         |
| 26. Angry or frustrated about not having<br>sufficient water                      |                      |                        |                        |                        |                         |
| <b>Stress Appraisal</b>                                                           | Strongly<br>Disagree | Disagree               | Neutral                | Agree                  | Strongly Agree          |
| 9. Felt drained or tired after completing domestic<br>tasks for the day           |                      |                        |                        |                        |                         |
| 10. Doing household tasks require a lot of<br>physical energy                     |                      |                        |                        |                        |                         |

11. Caring for children requires a lot of physical energy

|                                                                           |                |        |           |          |                   |
|---------------------------------------------------------------------------|----------------|--------|-----------|----------|-------------------|
| <b>Demand and Control</b>                                                 | Strongly Agree | Agree  | Neutral   | Disagree | Strongly Disagree |
| 13. Adequate time to complete domestic tasks assigned for the day         |                |        |           |          |                   |
| 14. Adequate time for hobbies and other meaningful activities             |                |        |           |          |                   |
| 15. Can choose not to do domestic work when tired or exhausted            |                |        |           |          |                   |
| <b>Social Support</b>                                                     | Never          | Rarely | Sometimes | Often    | Always            |
| 28. Do you ask family members for assistance with domestic tasks (Yes/No) |                |        |           |          |                   |
| 29. How often do you get assistance from family members                   |                |        |           |          |                   |
| 30. To what extent does family/spouse/child help with domestic work       |                |        |           |          |                   |

**Table S3.** Correlation between and across DWE regression based-factor scores

|                              | Physical A | Physical B              | Physical C                | Psycho A                   | Psycho B                   | Social                     |
|------------------------------|------------|-------------------------|---------------------------|----------------------------|----------------------------|----------------------------|
| Frequency of Domestic Tasks  | 1.00       | 0.10<br><i>p</i> = 0.15 | 0.31<br><i>p</i> < 0.001  | -0.359<br><i>p</i> < 0.001 | -0.32<br><i>p</i> < 0.005  | 0.25<br><i>p</i> < 0.001   |
| Water Sourcing and Carriage  |            | 1.00                    | 0.16,<br><i>p</i> = 0.002 | 0.08<br><i>p</i> = 0.13    | -0.07<br><i>p</i> = 0.17   | -0.168<br><i>p</i> = 0.001 |
| Experience of Water Scarcity |            |                         | 1.00                      | 0.15<br><i>p</i> = 0.012   | -0.065<br><i>p</i> = 0.256 | -0.08<br><i>p</i> = 0.41   |
| Stress Appraisal             |            |                         |                           | 1.00                       | 0.18<br><i>p</i> = 0.0014  | 0.17<br><i>p</i> = 0.0014  |
| Demand/Control               |            |                         |                           |                            | 1.00                       | 0.14<br><i>p</i> = 0.007   |
| Social                       |            |                         |                           |                            |                            |                            |

**File S1**

**\_DOMESTIC WORK EXPERIENCE QUESTIONNAIRE (ORIGINAL TOOL)**

**INSTRUCTION**

- We are researchers from the University of Iowa College of Public Health. We are interested in understanding how you perceive performance of domestic work and what coping resources you use to deal with stress.
- You are chosen to complete this survey because you are a woman between 18-49 years.
- Please respond to the questions from the Interviewer after indicating your consent.
- There are no right or wrong answers, so please answer the questions as they best relate to you.
- If you choose to respond to these questions, please feel free to provide genuine and accurate answers.
- If you do not fully understand or clearly hear the questions asked by the interviewer, please feel free to ask the interview to repeat herself.
- Completing this survey is completely voluntary, so please signify to the interviewer if you do not wish to provide an answer to a question or if you wish to stop at any time. Your responses will remain confidential and will not be linked back to you.
- The interview should take between 25-30 minutes to complete.
- When you have completed this questionnaire, the interviewer will give you a gift item.

**SECTION A: SOCIO-DEMOGRAPHIC CHARACTERISTICS**

1. Age \_\_\_\_\_(years)

2. Weight \_\_\_\_\_(kg) Height \_\_\_\_\_(cm)

3. **Marital status** of respondent

☐Single

☐Live with married spouse at home

☐Does not live with married spouse at home

☐Widowed

☐Divorced/separated

☐Others \_\_\_\_\_ (**please specify**)

4. How many **people** live in household? \_\_\_\_\_ (**number**)

5.

6. How many **children** live in household?

☐ Below 5 years \_\_\_\_\_

☐ Below 14 years \_\_\_\_\_

☐ Others \_\_\_\_\_ (*please specify, number of children and age*)

7. Highest level of **education** of respondent

☐ No formal education

☐ Primary School not completed

☐ Primary School completed

☐ Secondary School not completed

☐ Secondary School completed

☐ Tertiary education

☐ Others \_\_\_\_\_ (please specify)

8. **Ethnicity**

☐ Yoruba

☐ Hausa

☐ Igbo

☐ Others \_\_\_\_\_ (Please specify)

9. **Religion of respondent**

☐ Christianity

☐ Islam

☐ Traditional

☐ Others \_\_\_\_\_ (Please specify)

10. **Pregnancy status** of respondent

☐ Pregnant

☐ Non-pregnant but have been in the past (*please skip to question 12*)

☐ Never being pregnant (*please skip to question 19*)

11. If **pregnant**, how **old** is your pregnancy? i.e. (**months of pregnancy**) \_\_\_\_\_

(**Weeks of pregnancy**) \_\_\_\_\_

12. Is this your first pregnancy?

☐ Yes (*skip to question 22*)

☐ No

☐ Yes \_\_\_\_\_ (**what are they**)

13. Please **fill** in the information about **child/children** (from youngest to oldest child). Fill in “**W**” if child is walking and “**NW**” if child is not walking yet.

**Demographics of Child**

**Child One (under  
5)**

**Child Two (under  
5)**

Age of Child (years /months)

Weight of Child (*RA weigh child if child is  
present*)

Child Walking (W)

Child Not Walking (NW)

**SECTION B: WATER ACCESS, SOURCING AND COLLECTION PRACTICES**

*Access to water: Question 19 to 28*

14. What is/are the main source(s) of water regularly used by you and your household for drinking, washing, cooking and other purposes?

Mark TWO answer choices at MOST.

- ☐ Piped water into house/compound (running tap water present in houses or compound),
- ☐ Public tap/standpipe (fetch water from neighbor’s tap or public taps)
- ☐ Protected dug well (get water from well-covered well)
- ☐ Unprotected dug well (get water from not cased, uncovered well)
- ☐ Rainwater collection
- ☐ Surface water (river, dam, lake, ponds, stream, canals)
- ☐ Other (Please specify) \_\_\_\_\_

15. What are the **alternate** sources of water used by your household for drinking, washing, cooking and other purposes?

Mark ONE answer choice at MOST.

- ☐ Piped water into house/compound (running tap water present in houses or compound),
- ☐ Public tap/standpipe (fetch water from neighbor’s tap or public taps)
- ☐ Protected dug well (get water from well-covered well)
- ☐ Unprotected dug well (get water from not cased, uncovered well)
- ☐ Rainwater collection
- ☐ Surface water (river, dam, lake, ponds, stream, canals)
- ☐ Other (Please specify) \_\_\_\_\_

16. How would you rate the availability of water at your water source in the past two weeks?

- ☐ Rarely (once in a while)
- ☐ Occasionally (some of the time)
- ☐ Frequently (almost all the time)
- ☐ Always (every time)

17. Where is the **main** water source located?

- ☐ Inside your dwelling
- ☐ Around your compound (outside your dwelling) own yard/plot
- ☐ Anywhere else (please specify) \_\_\_\_\_

18. If **elsewhere**, how long does it take you to get to your water point, get water and come back home?

**Provide the time in minutes or hours.**

\_\_\_\_\_ (minutes) (hours)

- ☐ I do not know/cannot estimate

**Water collection labor: Question 19 to 26**

19. **Who** usually goes to the source to fetch the water **used by your household?** (select all that apply)

- ☐ Me
- ☐ Adult woman
- ☐ Adult man
- ☐ Female child \_\_\_\_\_ (age)
- ☐ Male child \_\_\_\_\_ (age)
- ☐ Others \_\_\_\_\_ (please specify)
- ☐ I do not know

20. **What** is the typical distance covered when you go to fetch water (*Prompt respondent to describe how far they walk*)?

- ☐ Not applicable (water in homes)
- ☐ Not more than few steps
- ☐ Opposite my house
- ☐ 2-5 minutes walking distance (within same street)
- ☐ 6-10 minutes walking distance
- ☐ 11-20 minutes walking distance
- ☐ >20 minutes walking distance
- ☐ Others \_\_\_\_\_(specify)



21. How would you describe your **terrain/pathway** of walk from water point?

- ☐ Normal
- ☐ Hilly
- ☐ Uneven
- ☐ Muddy
- ☐ Bushy
- ☐ Other \_\_\_\_\_ (please specify)

22. How **many trips** do you usually make to the water collection point? \_\_\_\_\_ (**trips**)

- ☐ I do not know/cannot estimate
- ☐ Not applicable (**woman is not responsible for water collection**)

23. What is the **quantity of water** you carry per trip to water collection point \_\_\_\_\_ (**liters**)?

*(you can tell respondents to show you the bucket/container they use to fetch water and describe the type of bowl if you cannot estimate in litres, the popular bath bowls are 30-35 litres)*

- ☐ I don't know
- ☐ Not applicable (**woman is not responsible for water collection**)

24. How much **water on average**, do you **use daily** as a household (one bucket is assumed to contain 20 liters) \_\_\_\_\_

*(ask them if they finish the water in their 120litre drum every day, or ask how many water bowls they fetch and is finished, estimate from there)*

☐ Cannot Quantify

25. How do you **carry** water?

- ☐ on my head
- ☐ wheelbarrow
- ☐ in my hands
- ☐ on my shoulder
- ☐ Not applicable
- ☐ Others \_\_\_\_\_ (Please Specify)

26. How do you **lift or lower** your bowl of water after fetching?

- ☐ unassisted
- ☐ assisted by another
- ☐ support with knee,

- ☐ support on well
- ☐ other

**Question 27 to 29: Experience of water scarcity**

27. In the past month, **has there been any time** when your household **did not have enough** quantity of water to use for household activities (drinking, cooking, bathing, washing) when needed?

- ☐ Yes
- ☐ No

28. If yes to question (23) (*ask the respondents*), What do you think is the reason for this?

---

29. Please mark an “X” below the response options that most closely describes your experience with water sourcing and **usage in the past 30 days**.

| Questions                                                                                                                                                                                                                            | Never | Rarely (1-2 times/month) | Sometimes (3-10 times/month) | Often (more than 10 times/month) | Others _____ (please specify) |
|--------------------------------------------------------------------------------------------------------------------------------------------------------------------------------------------------------------------------------------|-------|--------------------------|------------------------------|----------------------------------|-------------------------------|
| How often did you worry about your household having enough water for all its needs?                                                                                                                                                  |       |                          |                              |                                  |                               |
| How often did you or any household members use less water than you needed because there was not enough water or because it was too difficult to collect more water?                                                                  |       |                          |                              |                                  |                               |
| How often did you feel angry or frustrated about not having enough water for the household?<br>( <i>Meaning any water at all, whether for watering crops or livestock, washing your hands, washing clothes, or any other needs</i> ) |       |                          |                              |                                  |                               |

**SECTION C: DOMESTIC WORK HISTORY AND PRACTICES**

30. Do you make money from doing any work? (*Paid work is defined as a woman earning cash/kind from her job or business*)

☐Yes

☐No

31. If yes, what are the works/business that gives you money? (*Probe the woman to list all types of work that they do that fetches them money, a woman can have more than once source of income*)

\_\_\_\_\_ (please specify)

32. How many hours per day do you spend on your business/paid jobs per day for the past two weeks?

(*Respondents may be best able to describe how many hours they spend per day, the two weeks provide a representative time frame for the respondent to remember their typical work schedule*)

33. How many hours and time range do you usually spend on **doing chores within the home each day of the week?**

Monday \_\_\_\_\_ (hours /time range in morning) \_\_\_\_\_ (hours/time range in evening)

Tuesday \_\_\_\_\_ (hours /time range in morning) \_\_\_\_\_ (hours/time range in evening)

Wednesday \_\_\_\_\_ (hours /time range in morning) \_\_\_\_\_ (hours/time range in evening)

Thursday \_\_\_\_\_ (hours /time range in morning) \_\_\_\_\_ (hours/time range in evening)

Friday \_\_\_\_\_ (hours /time range in morning) \_\_\_\_\_ (hours/time range in evening)

Saturday \_\_\_\_\_ (hours /time range in morning) \_\_\_\_\_ (hours/time range in evening)

Sunday \_\_\_\_\_ (hours /time range in morning) \_\_\_\_\_ (hours/time range in evening)

**Question 34: frequency of Common Domestic Tasks**

34. Please mark an "X" below the response options selecting how frequently you perform the tasks.

| Domestic Task                    | Never/<br>not me | Rarely<br>(3<br>times/m<br>onth) | Sometimes<br>(2 -3<br>times/week) | Everyday | Twic<br>e in<br>the<br>day | Others<br>_____<br>(specify<br>time) |
|----------------------------------|------------------|----------------------------------|-----------------------------------|----------|----------------------------|--------------------------------------|
| Sweeping the floor               |                  |                                  |                                   |          |                            |                                      |
| Mopping the floor                |                  |                                  |                                   |          |                            |                                      |
| Cleaning the toilet and Bathroom |                  |                                  |                                   |          |                            |                                      |

|                                      |
|--------------------------------------|
| Fetching and carrying water          |
| Fetching and carrying firewood       |
| Carrying food produce                |
| Washing dishes/kitchen ware          |
| Manually washing clothes             |
| Grinding food manually               |
| Pounding food (mortar & pestle)      |
| Cooking                              |
| Bathing and dressing children        |
| Carrying and lifting children        |
| Gardening and Planting               |
| Ask respondents to list other chores |

35. Rank the **top 3 most difficult domestic task** by marking “D” and the **top 3 easiest domestic tasks** by marking ‘X’ besides elected tasks in the table below

*(DDD= most difficult, XXX= easiest)*

| Task                             | Physical stress Ranking |
|----------------------------------|-------------------------|
| Sweeping the floor               |                         |
| Mopping the floor                |                         |
| Cleaning the toilet and Bathroom |                         |
| Fetching and carrying water      |                         |
| Fetching and carrying firewood   |                         |

|                                           |  |
|-------------------------------------------|--|
| Carrying food produce                     |  |
| Washing dishes/kitchen ware               |  |
| Manually washing clothes                  |  |
| Food preparation before cooking           |  |
| Cooking                                   |  |
| Bathing and dressing children             |  |
| Carrying and lifting children             |  |
| Gardening and Planting                    |  |
| Other tasks specified by respondent _____ |  |

**Question 34: Posture and movement**

36. What work posture do you typically assume when doing any of the following each day? (Choose the chore and position by marking "X" in the table and indicate how many hours/minutes per day you do chores in these positions).

*(Show respondents these positions and explain repetitive movement as performing the same wrist/hand movement many times in a minute (e.g. washing, cutting, grinding))*

|                   |         |         |                          |                   |                                |                       |                    |                             |                                                          |
|-------------------|---------|---------|--------------------------|-------------------|--------------------------------|-----------------------|--------------------|-----------------------------|----------------------------------------------------------|
| Chores            | Sitting | Walking | Standing without walking | Back bent forward | Back Bending sideways/twisting | Neck bent and rotated | Squatting/kneeling | Arms lifted above shoulders | Repetitive movement of the wrists and fingers (>10 mins) |
| Sweeping          |         |         |                          |                   |                                |                       |                    |                             |                                                          |
| Mopping the floor |         |         |                          |                   |                                |                       |                    |                             |                                                          |

|                                   |
|-----------------------------------|
| Washing dishes                    |
| Washing clothes                   |
| Carrying children                 |
| Bathing children                  |
| Dressing children                 |
| Fetching water<br>from well       |
| Carrying water                    |
| Pounding food<br>produce          |
| Grinding food<br>produce manually |
| Cooking food                      |
| Other chores                      |

***Question 37 to 41: Lifting of children and other objects***

**37.** Do you **carry children** while performing household tasks?

☐ Yes

☐ No

☐ Not applicable

**38.** If yes, how frequent do you carry children while performing household tasks

☐ Rarely (once in a while)

☐ Occasionally (some of the time)

☐ Frequently (almost all the time)

☐ Always (every time)

**39.** How do you typically carry children while performing other household tasks?

☐ On the Back

☐ On the Hip

☐ On the arm

☐ Others \_\_\_\_\_ (please specify)

40. If yes, how old is/are the child or children you carry? \_\_\_\_\_ (age of child)

41.

42. On the average, how many times per workday do you lift, carry or transfer manually loads of different weight listed below?

☐ 0-5kg \_\_\_\_\_ times

☐ 6-10kg \_\_\_\_\_ times

☐ 16-25kg \_\_\_\_\_ times

☐ More than 25kg \_\_\_\_\_ times

☐ Others \_\_\_\_\_ (please specify)

***Question 43 to 45: Support from family members***

43. Do you ask any of your family member assistance with domestic tasks when you feel tired?

☐ Yes

☐ No

44. If yes how often do you ask for assistance from your family member with domestic tasks when you feel tired?

☐ Never

☐ Rarely

☐ Sometimes/Occasionally

☐ Always

45. To what extent does your children /spouse/any family member help in planning and performing housework?

☐ Never participates (Helps with 0% of tasks)

☐ Occasionally participates (helps with 1-24% of tasks)

☐ Frequently participates (helps with 25-49% of tasks)

☐ Always participates (helps with 50% or greater tasks)

***Question 46: Stress appraisal and Time demand-control***

46. Please mark an "X" below the response that most closely describes how much you agree with the statement.

| Statements                                                                      | Strongly<br>Disagree | Disagree | Neutral | Agree | Strongly<br>agree |
|---------------------------------------------------------------------------------|----------------------|----------|---------|-------|-------------------|
| I have sufficient time to complete the domestic tasks I need to do for the day. |                      |          |         |       |                   |

I have sufficient time for

hobbies or other activities that are meaningful to me.

I can effortlessly perform all my chores without assistance

Taking care of the home is not stressful.

I feel physically drained after completing the domestic tasks for the day.

When I am too tired or exhausted, I do not do my house chores

I enjoy doing domestic work

I am comfortable with performing house chores every day.

Doing household tasks requires a lot of physical effort.

Caring for children requires a lot of physical energy.

---
